# Supplementary material
Source: PubMed Central journal article supplement (PMC8640673)
Supplement: mmc1.pdf [file mmc1.pdf]

# THE LANCET

## Supplementary appendix

This appendix formed part of the original submission. We post it as supplied by the authors.

Supplement to: Abdool Karim SS, Abdool Karim Q. Omicron SARS-CoV-2 variant: a new chapter in the COVID-19 pandemic. *Lancet* 2021; **398**: 2126–28.

# SARS-Cov-2 cases in 1<sup>st</sup>, 2<sup>nd</sup>, 3<sup>rd</sup> & 4<sup>th</sup> waves: Gauteng Province of South Africa

(7-day moving average cases per 100,000 population – up to 05 December)

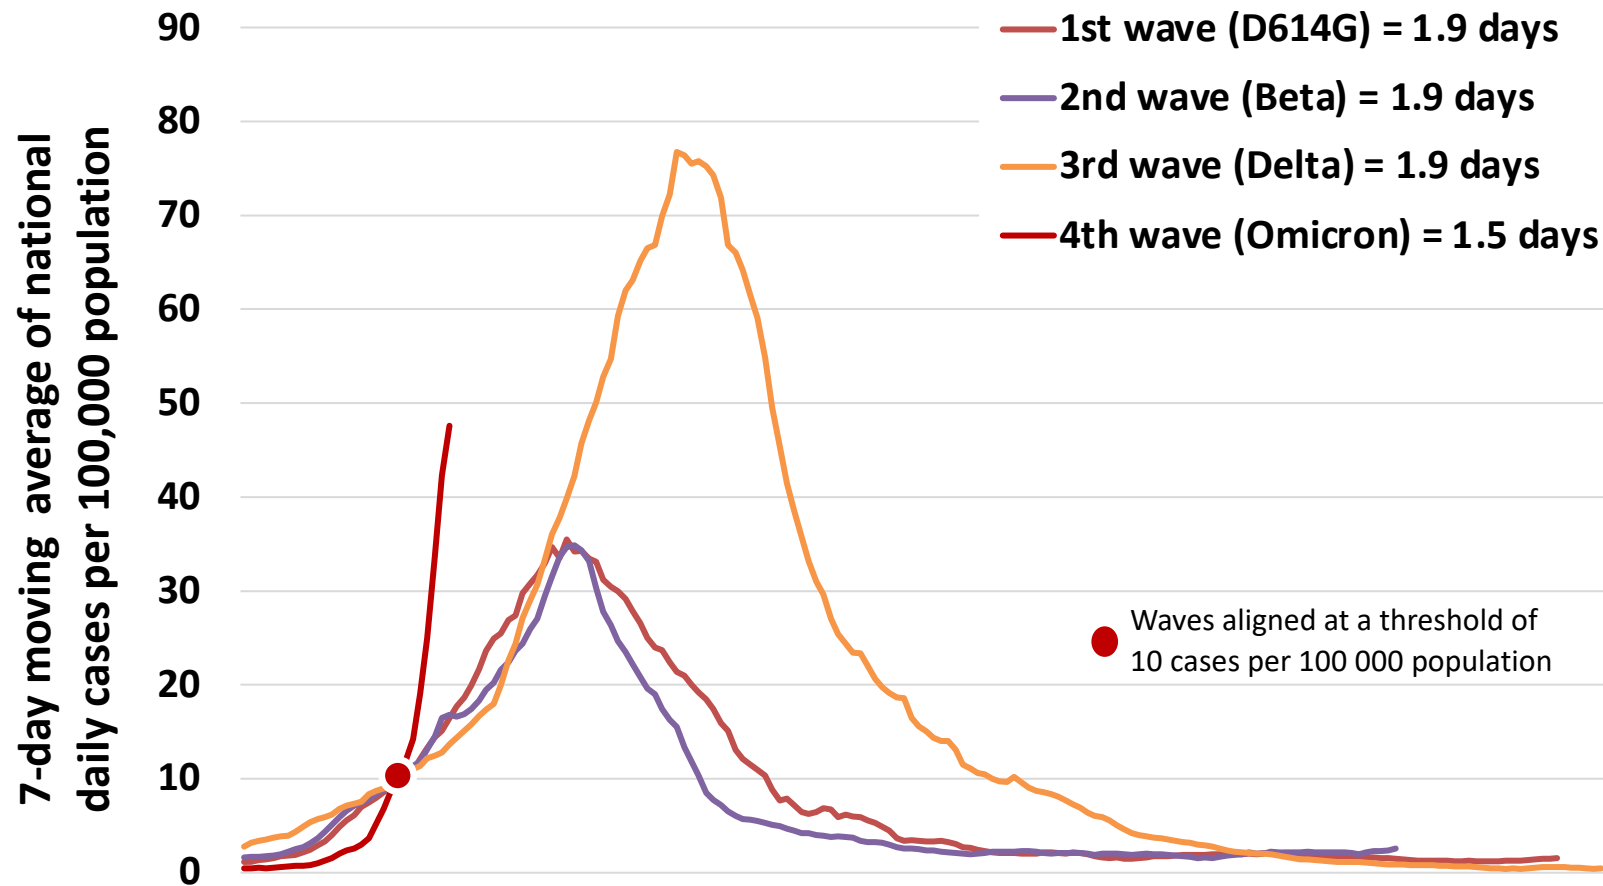

\*doubling time for the first seven days following the wave threshold of 10 cases per 100 000 population.

Data source: Department of Health – [sacoronavirus.co.za](http://sacoronavirus.co.za)
